# Supplementary material for: A high rate capability and long lifespan symmetric sodium-ion battery system based on a bipolar material Na2LiV2(PO4)3/C
Source: Royal Society of Chemistry journal article supplement (doi:10.1039/c8ta01314d), 2018-01-01
Supplement: c8ta01314d1.pdf [file c8ta01314d1.pdf]

## Supporting Information

# High Rate Capability and Long Lifespan Symmetric Sodium-ion Battery System Based on Bipolar Material $\text{Na}_2\text{LiV}_2(\text{PO}_4)_3/\text{C}$

*Meng Li<sup>a</sup>, Zonglin Zuo<sup>a</sup>, Jianqiu Deng<sup>\*a,c</sup>, Qingrong Yao<sup>\*c</sup>, Zhongmin Wang<sup>a,c</sup>, Huaiying Zhou<sup>a,c</sup>, Wen-Bin Luo<sup>\*b</sup>, Hua-Kun Liu<sup>b</sup>, Shi-Xue Dou<sup>b</sup>*

<sup>a</sup> School of Material Science and Engineering, Guilin University of Electronic Technology, Guangxi, Guilin 541004, China  
E-mail: jqdeng@guet.edu.cn

<sup>b</sup> Institute for Superconducting and Electronic Materials, University of Wollongong, Squires Way, Fairy Meadow, NSW 2500, Australia  
E-mail: luow@uow.edu.au

<sup>c</sup> Guangxi Key Laboratory of Information Materials, Guilin University of Electronic Technology, Guangxi, Guilin 541004, China

**Keywords:** Sodium-ion batteries; Bipolar materials; Symmetric full cell;  $\text{Na}_2\text{LiV}_2(\text{PO}_4)_3$ ; Nanocomposite

## Experimental

*Synthesis of active material* : Nanosized  $\text{Na}_2\text{LiV}_2(\text{PO}_4)_3/\text{C}$  (NLVP/C) was synthesized via a sol-gel method using  $\text{Na}_2\text{CO}_3$ ,  $\text{LiOH}\cdot\text{H}_2\text{O}$ ,  $\text{NH}_4\text{VO}_3$ ,  $\text{NH}_4\text{H}_2\text{PO}_4$ , oxalic acid, and glucose as starting materials. First,  $\text{NH}_4\text{VO}_3$  and oxalic acid were dissolved in 50 mL of deionized water under magnetic stirring at 70 °C to form a clear orange solution. Then, stoichiometric amounts of  $\text{Na}_2\text{CO}_3$ ,  $\text{LiOH}\cdot\text{H}_2\text{O}$ ,  $\text{NH}_4\text{H}_2\text{PO}_4$ , and glucose were added to the solution, and the mixed solution was stirred continually until the green precursor gel was obtained. The amount of glucose was based on 10 wt.% residual carbon content of NLVP/C. Finally, the obtained gel was dried at 120 °C for 12 h in a vacuum oven. After grinding, the precursor was pre-heated at 350 °C for 4 h and calcined at 750 °C for 10 h in a tube furnace under flowing Ar containing 5%  $\text{H}_2$  to yield the final product. The pure NLVP was also prepared according to the same synthetic route of NLVP/C except for the addition of glucose.

*Materials characterizations*: The crystalline phase of the product was characterized by X-ray diffraction (XRD) using a PIXcel<sup>3D</sup> power diffractometer with Cu  $\text{K}\alpha$  radiation in the  $2\theta$  range of 10 – 80° at a scan rate of 2 °/min. The morphology and particle size of NLVP/C were observed with a scanning electron microscope (FESEM, HitachiS-4800) and a high-resolution transmission electron microscope (HRTEM, Tecnai G2 F20, 200 kV). The carbon content of NLVP/C was determined by thermogravimetric (TG) analysis. X-ray photoelectron spectroscopy (XPS) was carried out using an ESCALAB-250Xi spectrometer. Raman spectra were obtained from a LabRAM HR Evolution Raman micro-spectroscope with 532 nm laser radiation in the range of 100–2000  $\text{cm}^{-1}$ .

*Electrochemical measurements*: The electrochemical performance of NLVP/C was measured by using 2023-type coin cell. The working electrodes was prepared by milling a mixture of 70 wt% active material, 20 wt% Super P carbon, and 10 wt% polyvinylidene fluoride (PVDF) in N-methyl-2-pyrrolidone (NMP). The obtained slurry was spread onto aluminum foil and dried

at 120 °C for 12 h in a vacuum oven. The electrode loading mass is around 1.5 to 2.0 mg cm<sup>-2</sup>. After punching the electrode film into disks with the diameters of 1.4 cm (cathode) and 1.2 cm (anode), the cells were assembled in an argon-filled glove box using NLVP/C as cathode, sodium metal as anode, Whatman glass fiber (Grade GF/D) as separator, and a 1 M solution of NaClO<sub>4</sub> in ethylene carbonate (EC) and diethyl carbonate (DEC) (1:1 by volume) as the electrolyte. Full sodium ion cells were constructed using NLVP/C as cathode and anode. The mass ratio of the cathode and anode was designed to be close to 2:1. All the cells were tested at room temperature. The galvanostatic charge–discharge cycling was performed on an Arbin BT2000 automatic battery testing system. The electrochemical impedance spectroscopy (EIS) and cyclic voltammetry (CV) were carried out on a Solartron electrochemical workstation. The chemical diffusion coefficients of Na ions in the electrodes can be calculated using Fick’s second law by Equation (1) <sup>48</sup>:

$$D_{Na^+} = \frac{4}{\pi} \left( \frac{m_B V_M}{M_B A} \right) \left( \frac{\Delta E_s}{\tau \frac{dE_\tau}{d\sqrt{\tau}}} \right)^2 \quad (\tau \ll L^2 / D_{Na^+}) \quad (1)$$

In this equation,  $V_M$  is the molar volume of the active materials,  $M_B$  and  $m_B$  are the molecular weight (g mol<sup>-1</sup>) and mass loading (g) of the active materials (sodium host).  $A$  is the surface area of the electrode,  $L$  is the thickness of the electrode,  $\tau$  is the titration time, and  $\Delta E_s$  is the difference between the original voltage  $E_0$  and the steady-state voltage  $E_s$  (**Figure S6a**, Supporting Information). The value of  $dE_\tau/d\tau^{1/2}$  can be obtained from a plot of the voltage versus the square root of the time during the current pulse. When the voltage shows a linear relationship with  $\tau^{1/2}$  during titration, as in **Figure S6b**, Eq. (2) can be simplified as <sup>48</sup>:

$$D_{Na^+} = \frac{4}{\pi\tau} \left( \frac{m_B V_M}{M_B A} \right) \left( \frac{\Delta E_s}{\Delta E_\tau} \right)^2 \quad (2)$$

**Table S1.** Atomic positions of (a) rhombohedral  $\text{Li}_3\text{V}_2(\text{PO}_4)_3$  and (b) rhombohedral  $\text{Na}_3\text{V}_2(\text{PO}_4)_3$  deduced from the Rietveld refinement of XRD data.

(a)

| Atom | Wyckoff site | $x$     | $y$      | $z$     |
|------|--------------|---------|----------|---------|
| V1   | 18           | 0       | 0        | 0.14615 |
| V2   | 18           | 0       | 0        | 0.65310 |
| P1   | 18           | 0.29233 | 0.00187  | 0.25136 |
| O1   | 18           | 0.19148 | -0.00958 | 0.19192 |
| O2   | 18           | 0.76561 | 0.91258  | 0.68983 |
| O3   | 18           | 0.24341 | 0.80073  | 0.26840 |
| O4   | 18           | 0.50057 | 0.87958  | 0.75564 |
| Li1  | 18           | 0.34105 | 0.02406  | 0.38187 |

(b)

| Atom | Wyckoff site | $x$     | $y$      | $z$     |
|------|--------------|---------|----------|---------|
| Na1  | 36           | 0       | 0        | 0       |
| Na2  | 36           | 0.63481 | 0        | 0.25002 |
| V1   | 36           | 0       | 0        | 0.14876 |
| P1   | 36           | 0.29026 | 0        | 0.25005 |
| O1   | 36           | 0.17933 | -0.02673 | 0.19371 |
| O2   | 36           | 0.19111 | 0.16856  | 0.08895 |

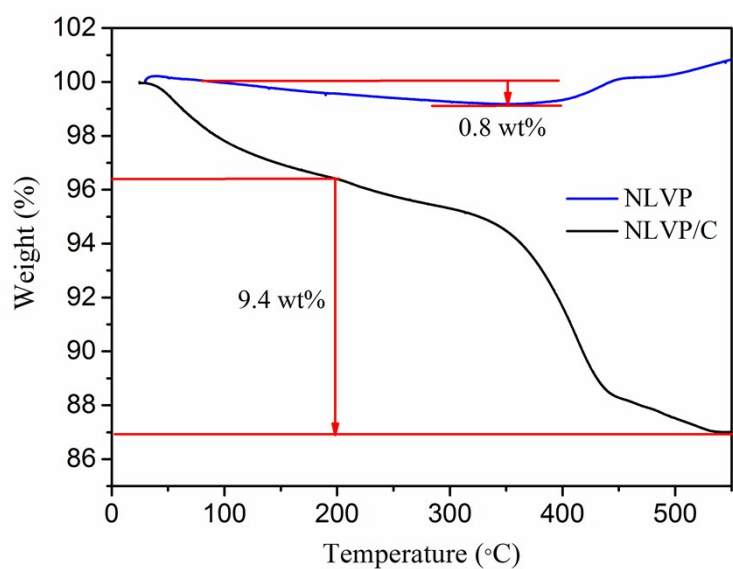

**Figure S1.** TGA curve of pure NLVP and NLVP/C.

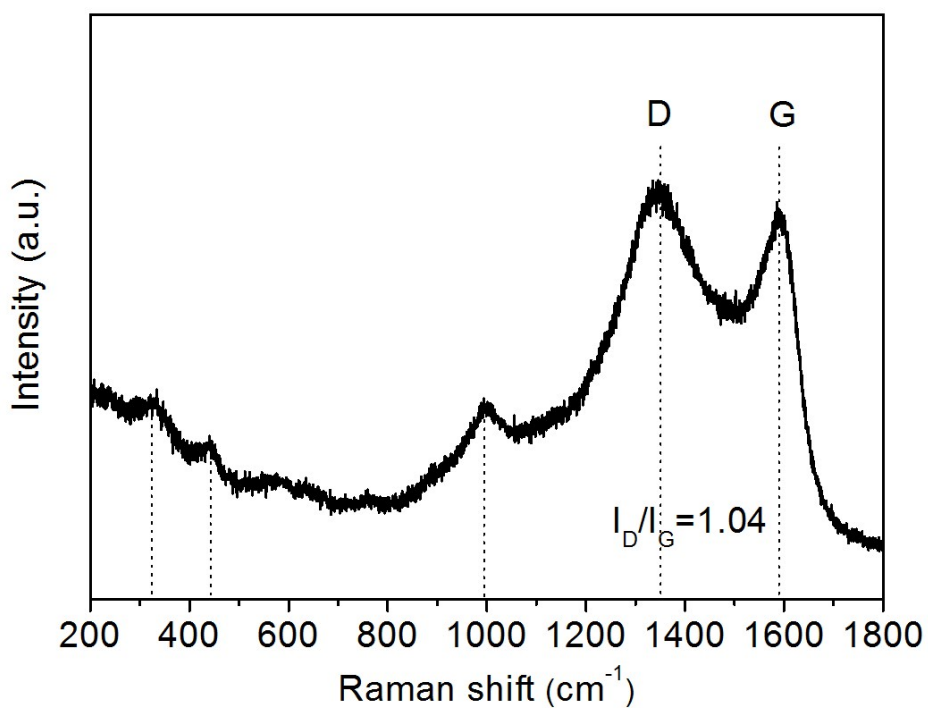

**Figure S2.** Raman spectrum of NLVP/C.

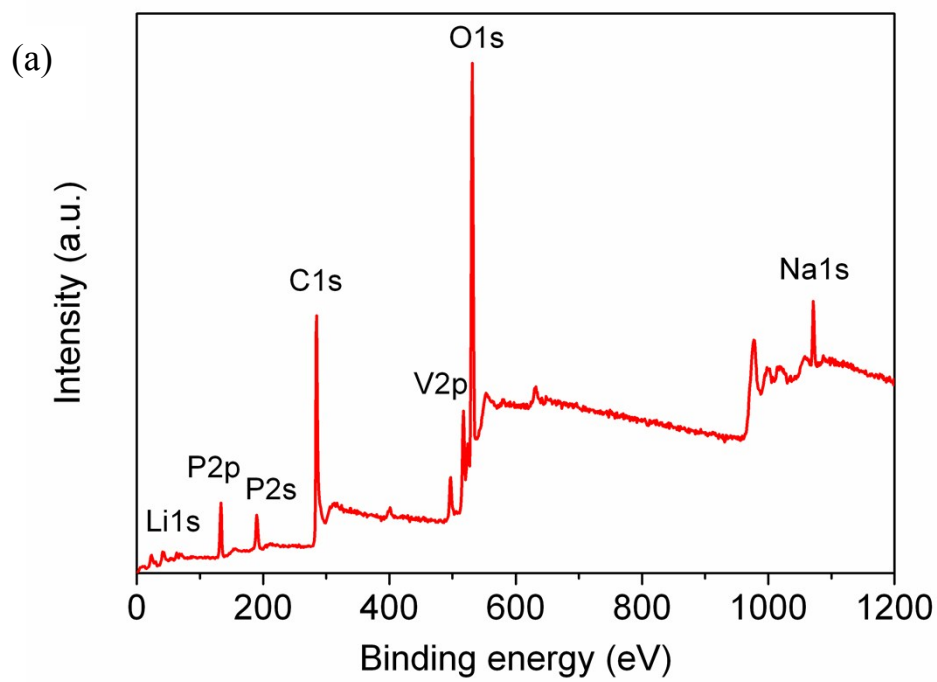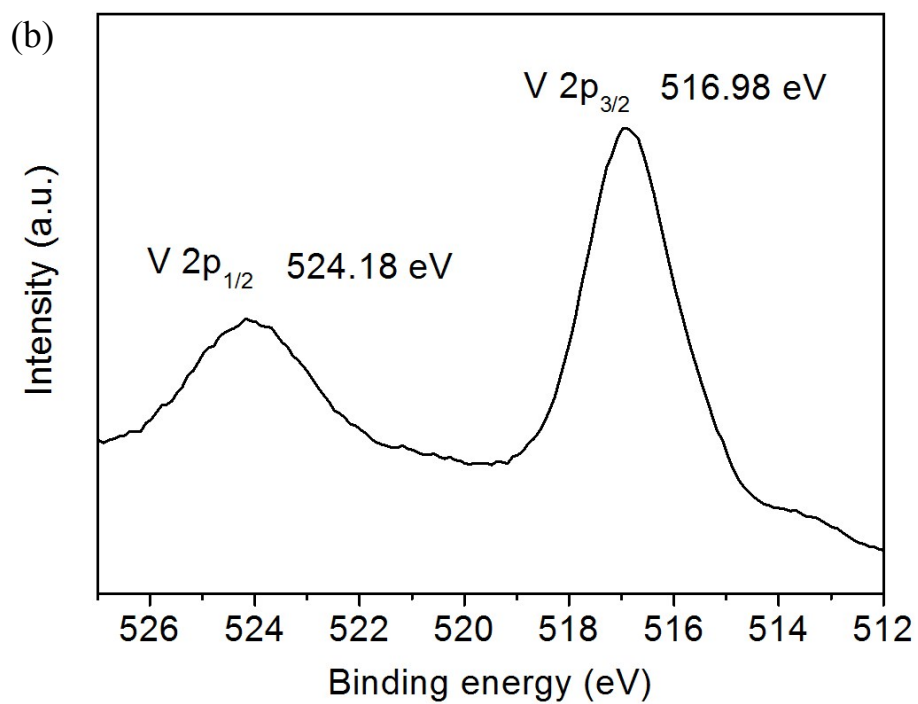

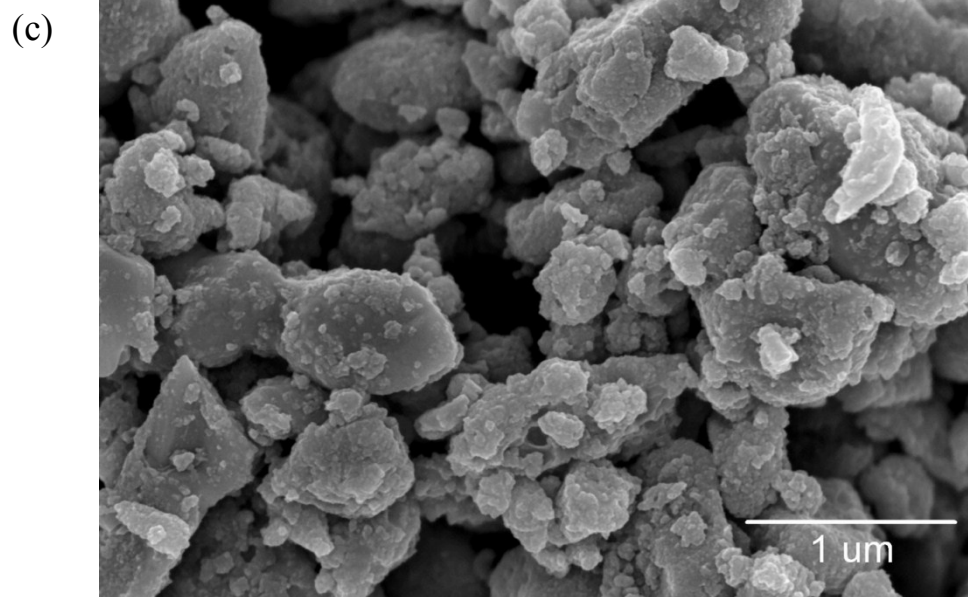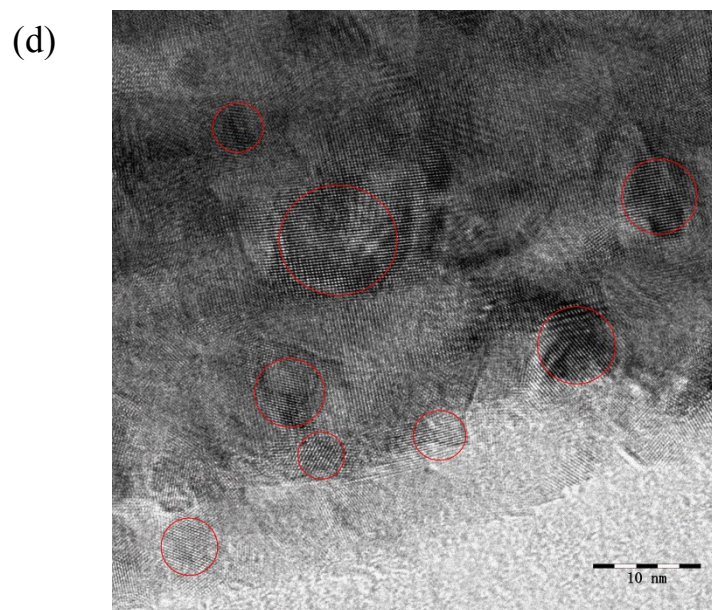

**Figure S3.** (a, b) XPS spectra, (c) SEM image and (d) HRTEM image of NLVP/C.

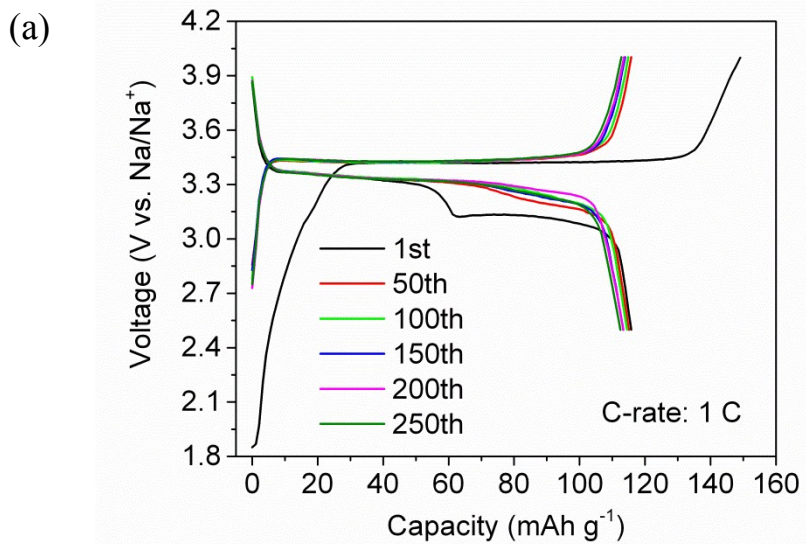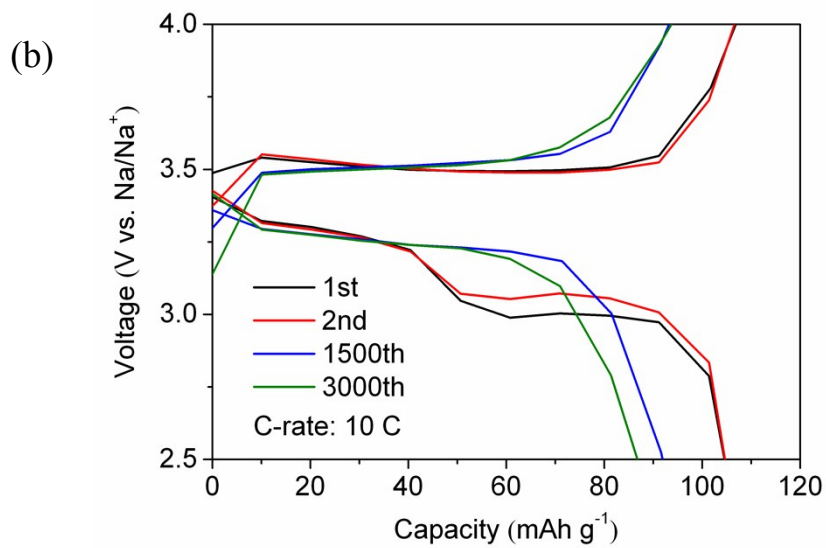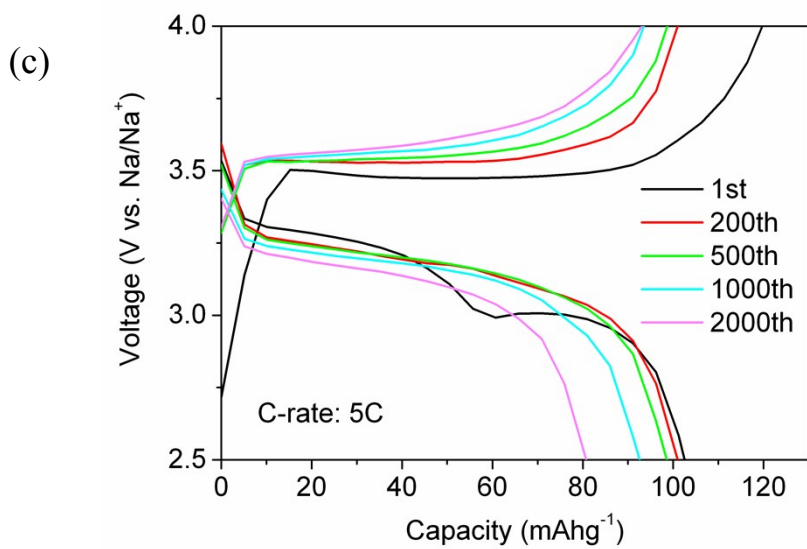



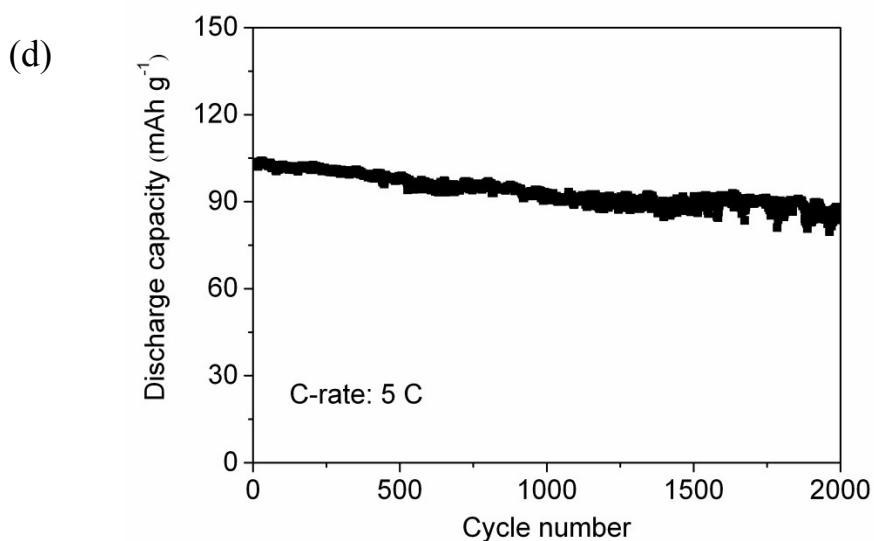

**Figure S4.** Charge and discharge curves of NLVP/C as cathode material at 1 C (a), 10 C (b), and 5 C (c); (d) Cycling performance of NLVP/C at 5 C.

**Table S2.** Comparison of electrochemical properties of NLVP/C in this work with those of various previously reported polyanion-type cathodes for SIBs.

| Cathodes                                                                                                  | Reversible capacity                                                                                  | Capacity retention                                                          | Ref.      |
|-----------------------------------------------------------------------------------------------------------|------------------------------------------------------------------------------------------------------|-----------------------------------------------------------------------------|-----------|
| Na <sub>3</sub> V <sub>2</sub> (PO <sub>4</sub> ) <sub>3</sub> @C nanocomposite                           | 94.9 mAh g <sup>-1</sup> , 5 C                                                                       | 96.1%, 5 C, 700 cycles                                                      | S1        |
| Na <sub>3</sub> V <sub>2</sub> (PO <sub>4</sub> ) <sub>3</sub> /C particles                               | 107.6 mAh g <sup>-1</sup> , 1 C<br>106.3 mAh g <sup>-1</sup> , 2 C<br>95.6 mAh g <sup>-1</sup> , 5 C | 74.4%, 1 C, 600 cycles<br>63.0%, 2 C, 200 cycles<br>60.7%, 5 C, 200 cycles  | S2        |
| Na <sub>3</sub> V <sub>2</sub> (PO <sub>4</sub> ) <sub>3</sub> @C@CMK-3                                   | 109 mAh g <sup>-1</sup> , 5 C<br>106 mA h g <sup>-1</sup> , 10 C<br>102 mAh g <sup>-1</sup> , 20 C   | 68%, 5 C, 2000 cycles<br>85%, 10 C, 1000 cycles<br>67.3%, 20 C, 1000 cycles | S3        |
| Na <sub>3</sub> V <sub>2</sub> (PO <sub>4</sub> ) <sub>3</sub> /C+N particles                             | 104.6 mAh g <sup>-1</sup> , 1 C<br>74.5 mAh g <sup>-1</sup> , 5 C                                    | 86.8%, 1 C, 100 cycles<br>92.6%, 5 C, 100 cycles                            | S4        |
| NaFePO <sub>4</sub> /C                                                                                    | 99.4 mAh g <sup>-1</sup> , 0.5 C                                                                     | 95%, 0.5 C, 200 cycles                                                      | S5        |
| Na <sub>7</sub> V <sub>4</sub> (P <sub>2</sub> O <sub>7</sub> ) <sub>4</sub> (PO <sub>4</sub> )/C nanorod | 92.1 mAh g <sup>-1</sup> , 0.05 C                                                                    | 95.2%, 0.05 C, 200 cycles<br>92.6%, 0.5 C, 200 cycles                       | S6        |
| Ultrafine Na <sub>7</sub> V <sub>3</sub> (P <sub>2</sub> O <sub>7</sub> ) <sub>4</sub> /C                 | 73 mAh g <sup>-1</sup> , 0.025 C                                                                     | 92%, 10 C, 100 cycles                                                       | S7        |
| Na <sub>3.32</sub> Fe <sub>2.34</sub> (P <sub>2</sub> O <sub>7</sub> ) <sub>2</sub> @C                    | 72.5 mAh g <sup>-1</sup> , 5 C                                                                       | 90%, 5 C, 1100 cycles                                                       | S8        |
| Na <sub>3</sub> V <sub>2</sub> (PO <sub>4</sub> ) <sub>2</sub> F <sub>3</sub> /C@RGO                      | 124.5 mAh g <sup>-1</sup> , 1 C                                                                      | 87%, 1 C, 700 cycles                                                        | S9        |
| CNT-decorated Na <sub>3</sub> V <sub>2</sub> (PO <sub>4</sub> ) <sub>3</sub> microspheres                 | 96.0 mAh g <sup>-1</sup> , 10 C                                                                      | 92.60%, 10 C, 150 cycles                                                    | S10       |
| NaVPO <sub>4</sub> F/C Nanofibers                                                                         | 100 mAh g <sup>-1</sup> , 2 C                                                                        | 96.5%, 2C, 1000 cycles                                                      | S11       |
| Na <sub>2</sub> FePO <sub>4</sub> F-rGO composites                                                        | 60 mAh g <sup>-1</sup> , 10 C                                                                        | 70%, 10C, 5000 cycles                                                       | S12       |
| Na <sub>3</sub> V <sub>2</sub> O <sub>2</sub> (PO <sub>4</sub> ) <sub>2</sub> F/rGO microsphere composite | 90 mAh g <sup>-1</sup> , 30 C                                                                        | 83.4%, 30 C, 2000 cycles                                                    | S13       |
| Na <sub>2</sub> LiV <sub>2</sub> (PO <sub>4</sub> ) <sub>3</sub> /C nanocomposite                         | 115.8 mAh g <sup>-1</sup> , 1 C<br>104.8 mAh g <sup>-1</sup> , 10 C                                  | 97.2%, 1 C, 250 cycles<br>83%, 10 C, 3000 cycles                            | This work |

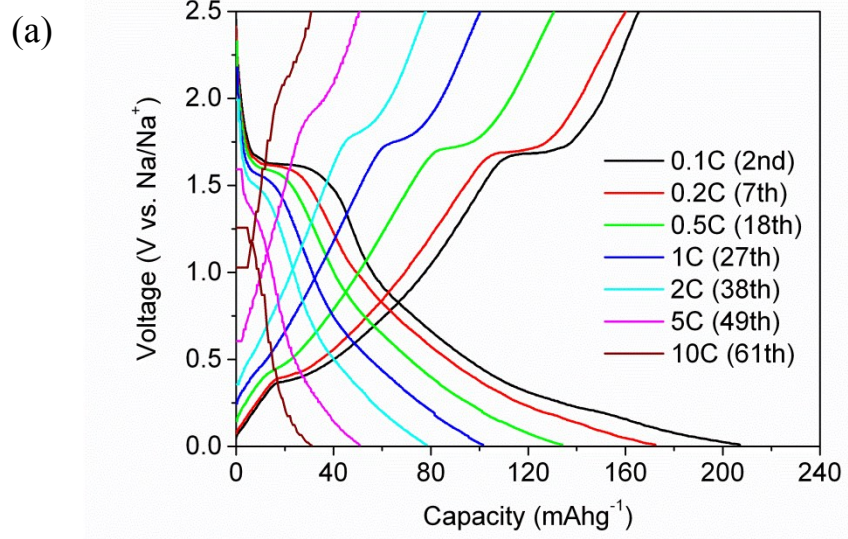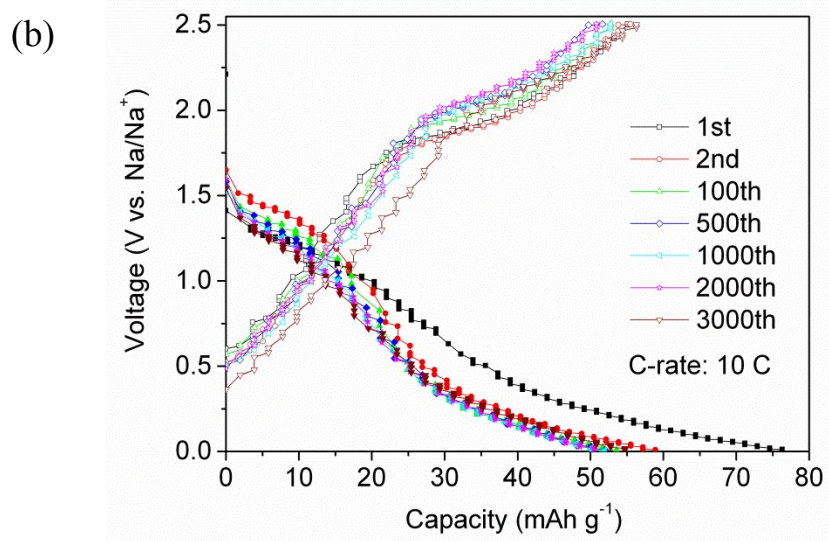

(c)

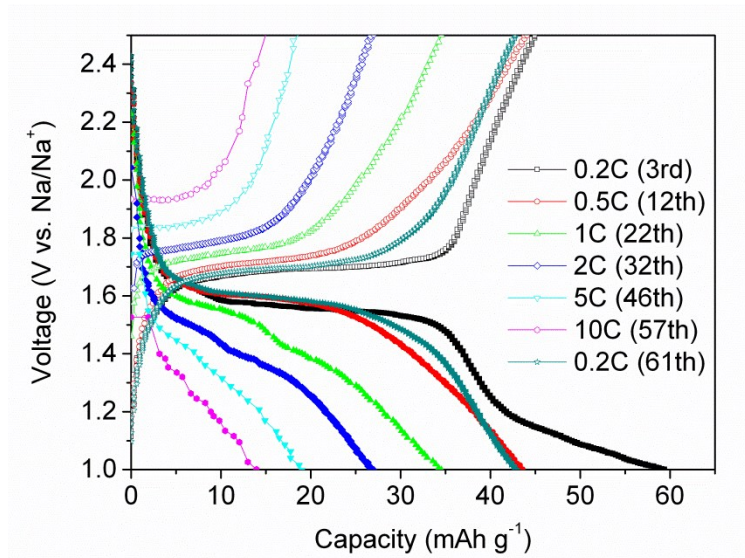

(d)

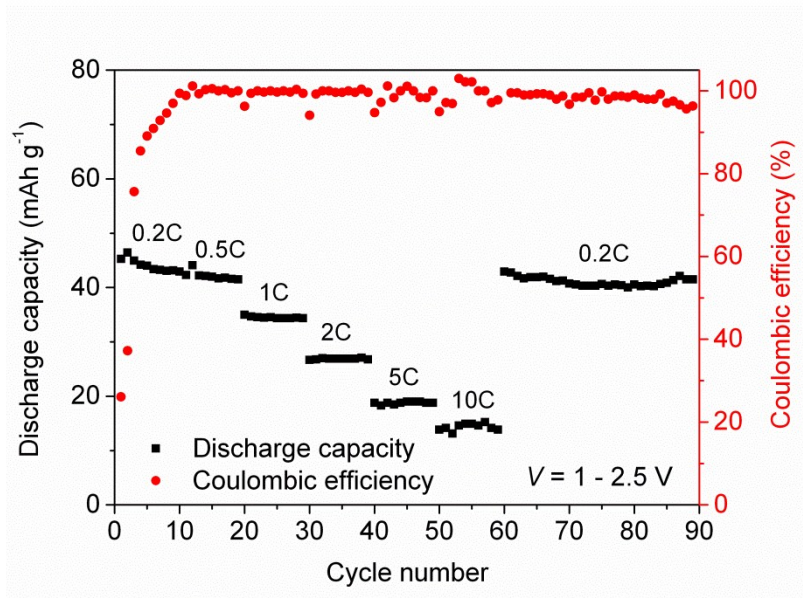

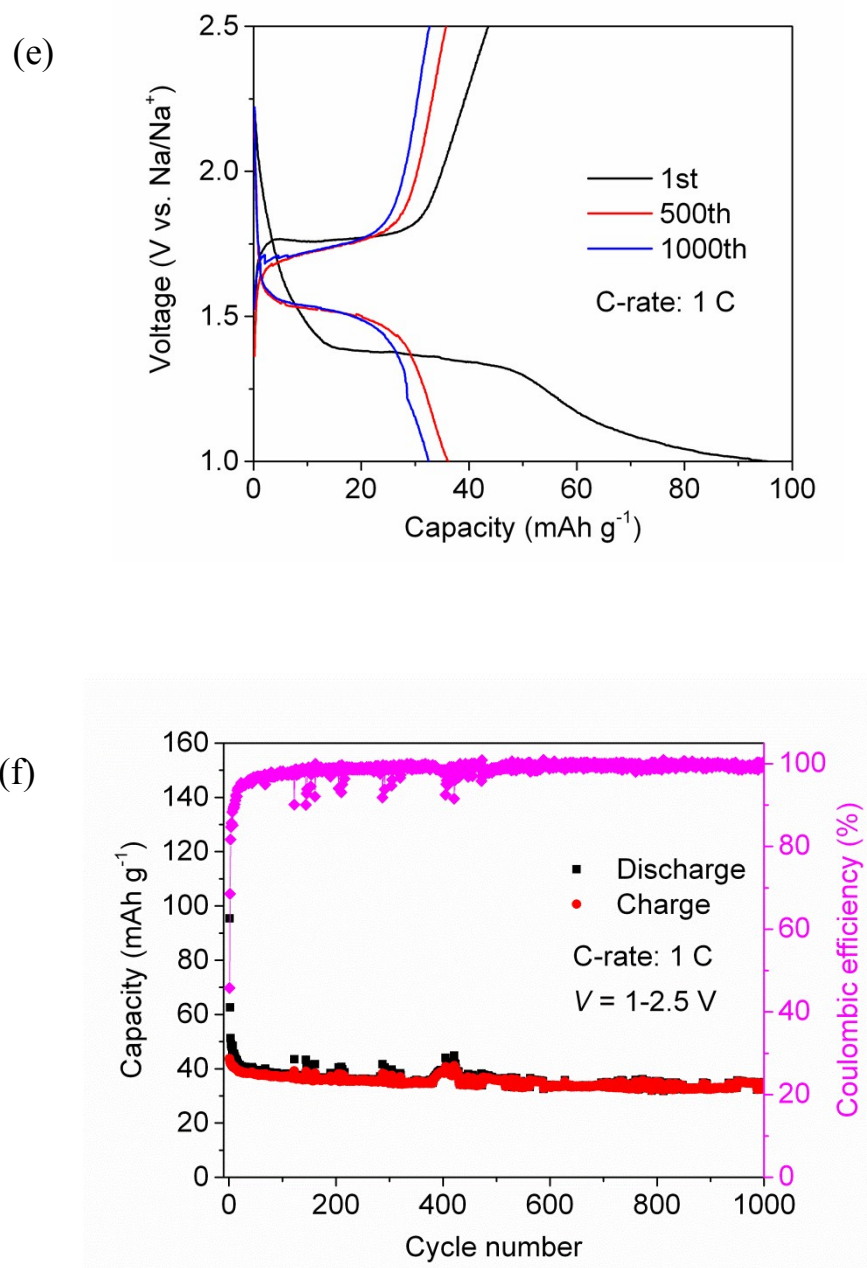

**Figure S5.** (a) Discharge/charge curves of NLVP/C as anode at different current rates. (b) Discharge/charge curves of NLVP/C at 10 C. (c) Discharge/charge curves and (d) rate capability of NLVP/C as anode at different current rates. (e, f) Discharge/charge curves and cycling performance of NLVP/C at 1 C. The voltage window was 1.0–2.5 V for all these measurements.

(a)

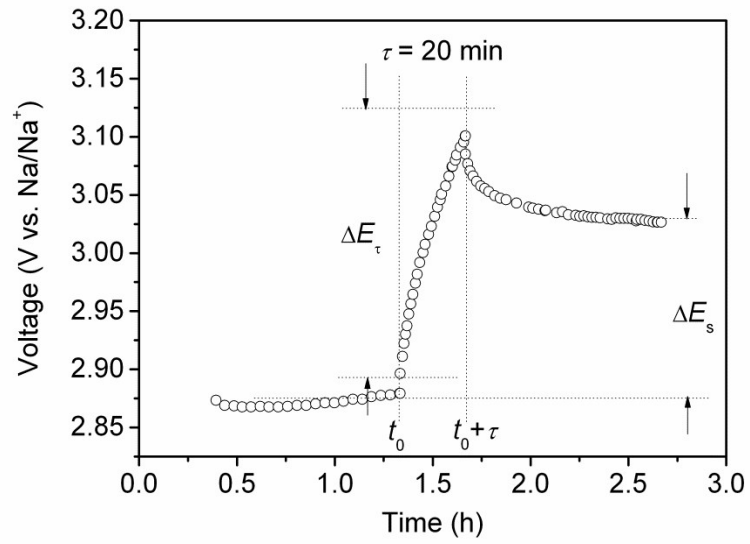

(b)

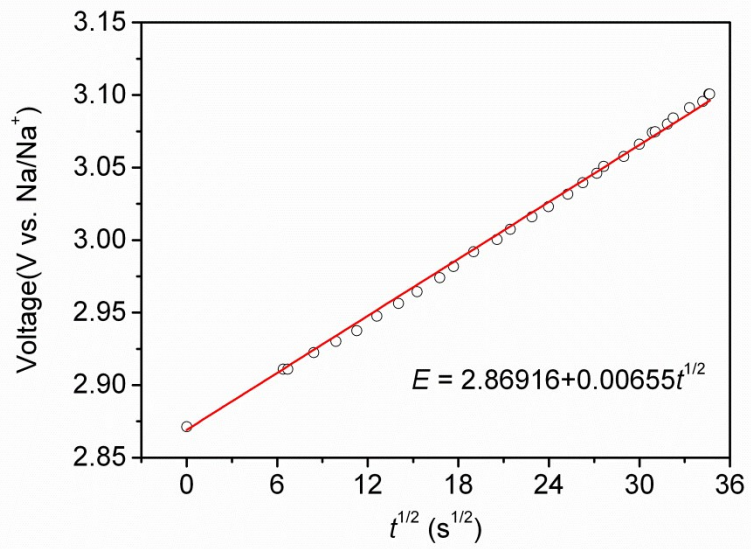



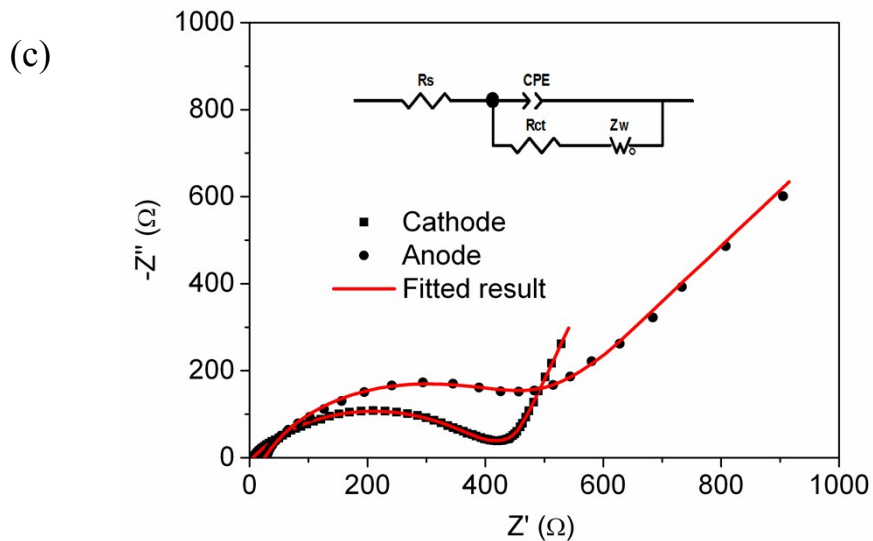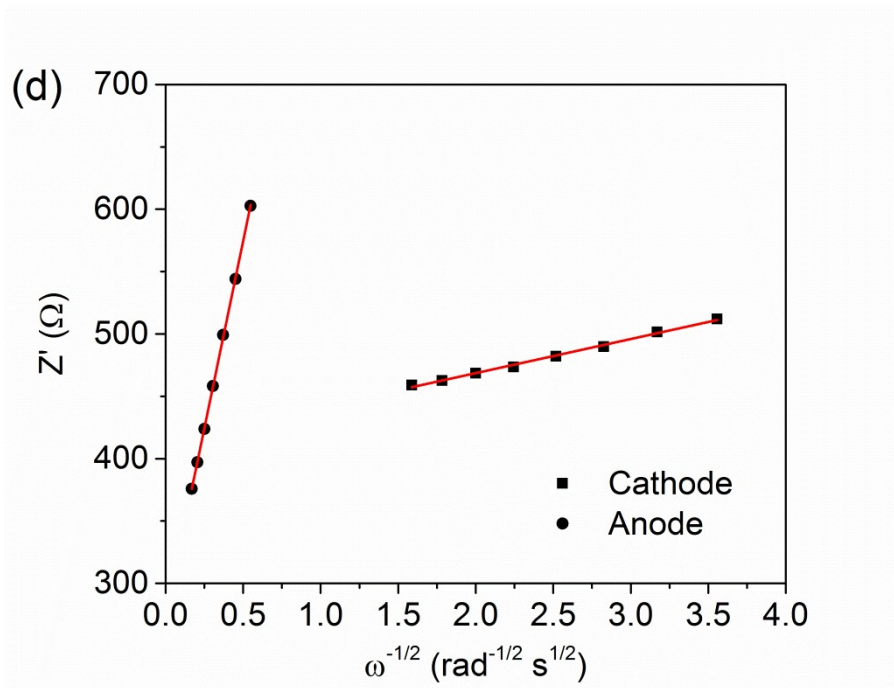

**Figure S6.** (a) Demonstration of a single titration at 2.88V during the GITT test of NLVP/C cathode. (b) Plot of the linear relationship of voltage against  $\tau^{1/2}$  during a single titration at 2.88 V. (c) Nyquist plots and fitting curves of NLVP/C electrodes after 10 charge–discharge cycles. (d) The relationship between  $Z'$  and  $\omega^{-1/2}$  at low frequency region for NLVP/C electrodes.

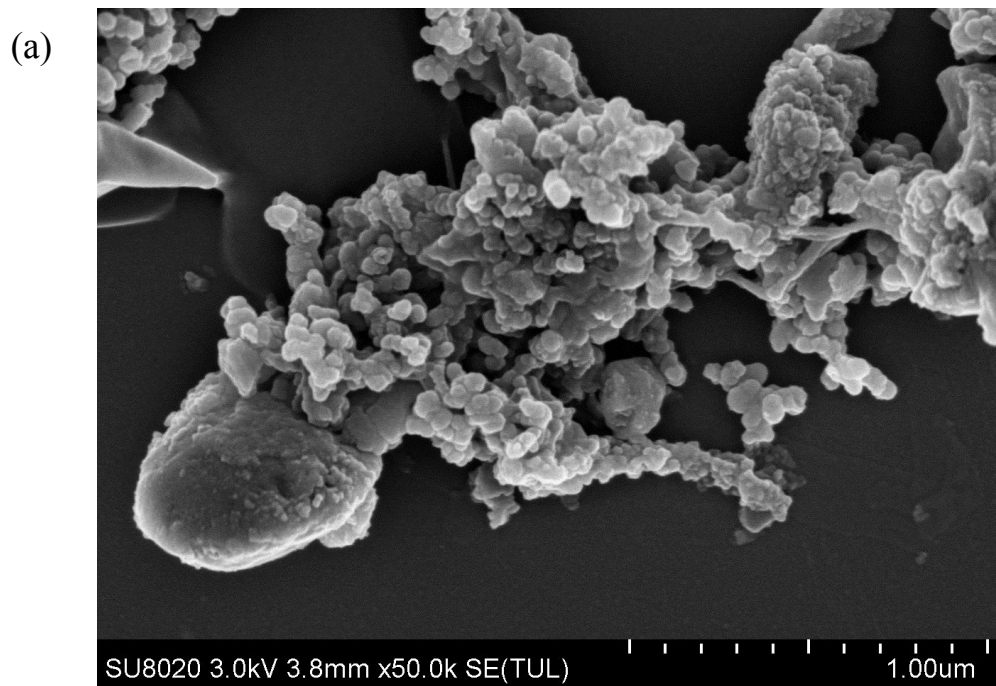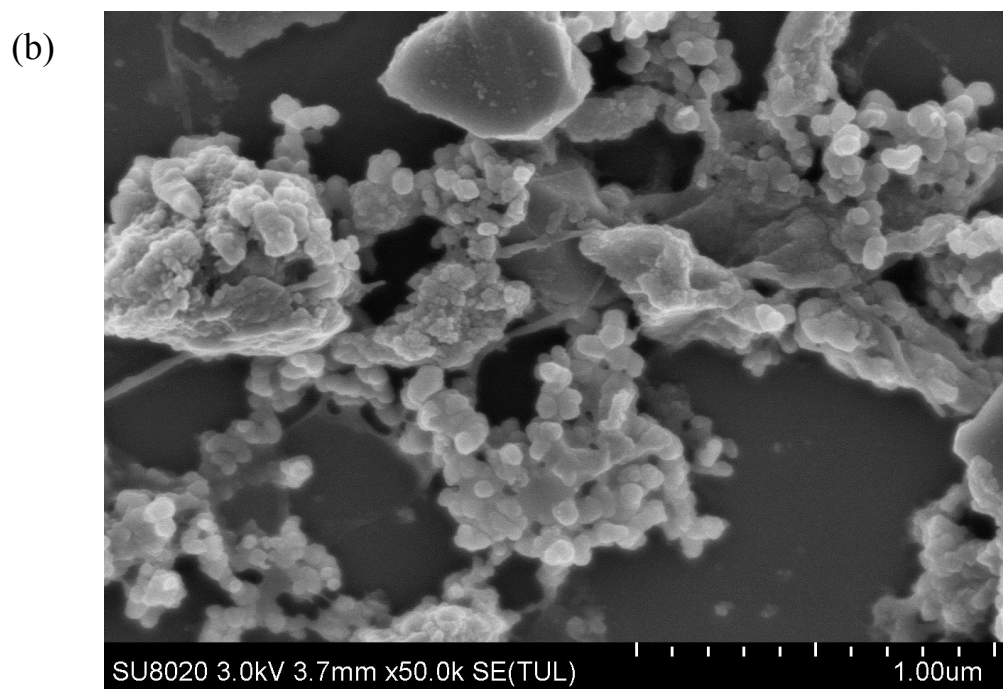

**Figure S7.** SEM images of (a) the as-prepared electrode and (b) the cycled electrode over 250 cycles at 1 C.

**References:**

- [S1] W. Duan, Z. Zhu, H. Li, Z. Hu, K. Zhang, F. Cheng and J. Chen, *J. Mater. Chem. A*, 2014, **2**, 8668–8675.
- [S2] H. Li, X. Bi, Y. Bai, Y. Yuan, R. Shahbazian-Yassar, C. Wu, F. Wu, J. Lu and K. Amine, *Adv. Mater. Interfaces*, 2016, **3**, 1500740.
- [S3] Y. Jiang, Z. Yang, W. Li, L. Zeng, F. Pan, M. Wang, X. Wei, G. Hu, L. Gu and Y. Yu, *Adv. Energy Mater.*, 2015, **5**, 1402104.
- [S4] W. Shen, C. Wang, Q. Xu, H. Liu and Y. Wang, *Adv. Energy Mater.*, 2014, **5**, 1400982.
- [S5] J. Kim, D.-H. Seo, H. Kim, I. Park, J.-K. Yoo, S.-K. Jung, Y.-U. Park, W. A. Goddard III, and K. Kang, *Energy Environ. Sci.*, 2015, **8**, 540–545.
- [S6] C. Deng and S. Zhang, *ACS Appl. Mater. Interfaces*, 2014, **6**, 9111–9117.
- [S7] C. Deng, S. Zhang and B. Zhao, *Energy Storage Mater.* 2016, **4**, 71–78.
- [S8] M. Chen, L. Chen, Z. Hu, Q. Liu, B. Zhang, Y. Hu, Q. Gu, J.-L. Wang, L.-Z. Wang, X. Guo, S.-L. Chou and S.-X. Dou, *Adv. Mater.* 2017, **29**, 1605535.
- [S9] L. Li, Y. Xu, X. Sun, S. He and L. Li, *Chem. Eng. J.*, 2018, **331**, 712–719.
- [S10] H. Chen, B. Zhang, X. Wang, P. Dong, H. Tong, J.-C. Zheng, W. Yu and J. Zhang, *ACS Appl. Mater. Interfaces*, 2018, **10**, 3590–3595.
- [S11] T. Jin, Y. Liu, Y. Li, K. Cao, X. Wang and L. Jiao, *Adv. Energy Mater.*, 2017, **7**, 1700087.
- [S12] J.S. Ko, V.V.T. Doan-Nguyen, H.-S. Kim, X. Petrissans, R.H. DeBlock, C.S. Choi, J.W. Long and B.S. Dunn, *J. Mater. Chem. A*, 2017, **5**, 18707–18715.
- [S13] Y. Yin, F. Xiong, C. Pei, Y. Xu, Q. An, S. Tan, Z. Zhuang, J. Sheng, Q. Li and L. Mai, *Nano Energy*, 2017, **41**, 452–459.
